# Supplementary material for: WGS of Commensal Neisseria Reveals Acquisition of a New Ribosomal Protection Protein (MsrD) as a Possible Explanation for High Level Azithromycin Resistance in Belgium
Source: MDPI journal article supplement (doi:10.3390/pathogens10030384), 2021-03-23
Supplement: s1 [file s1]

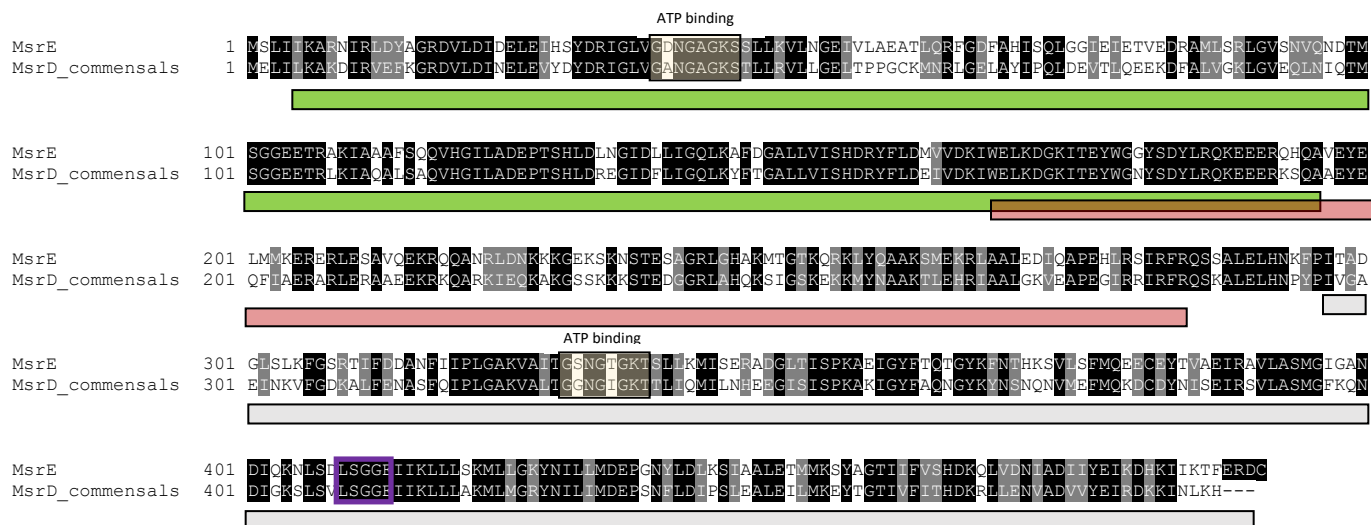

Supplemental figure 4. Alignment of msrE and msrD, with ATP binding domains, ABC1 domain (green bar), ABC2 domain (grey bar), P site tRNA interaction motif (PtIM, formerly called ABC\_tran\_Xtn, red bar) and signature sequence (purple box).
