# Supplementary material for: WGS of Commensal Neisseria Reveals Acquisition of a New Ribosomal Protection Protein (MsrD) as a Possible Explanation for High Level Azithromycin Resistance in Belgium
Source: MDPI journal article supplement (doi:10.3390/pathogens10030384), 2021-03-23

Supplemental figure 1b. Boxplot of ceftriaxone MICs from commensal and pathogenic isolates in the panel. Red dot indicate the median, black dots indicates all separate isolates.

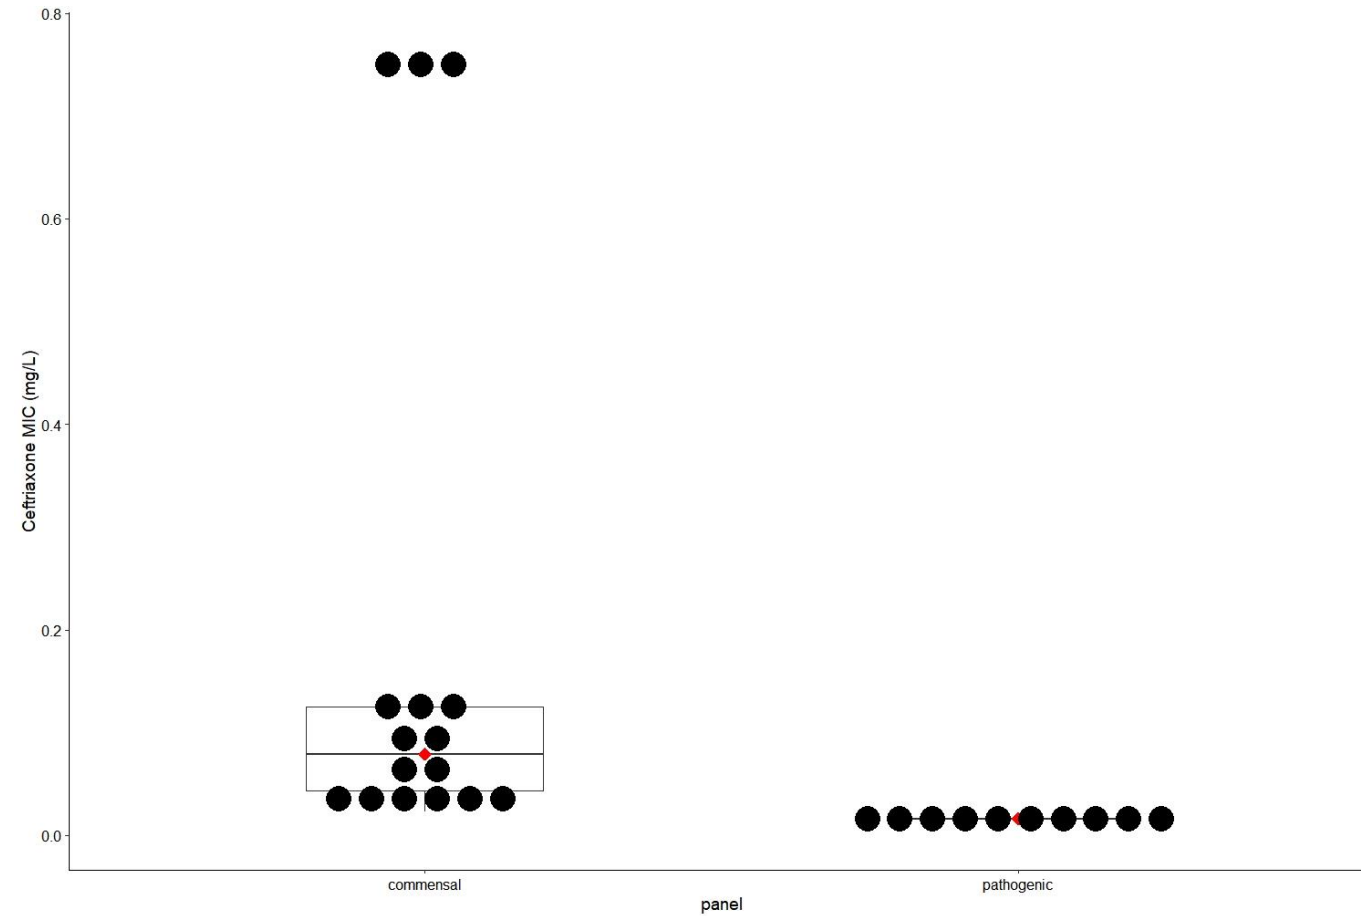

Supplement: s1 [file s1]
