# Supplementary material for: WGS of Commensal Neisseria Reveals Acquisition of a New Ribosomal Protection Protein (MsrD) as a Possible Explanation for High Level Azithromycin Resistance in Belgium
Source: MDPI journal article supplement (doi:10.3390/pathogens10030384), 2021-03-23
Supplement: s1 [file s1]

| Sample      | Genome Size (bp) | No contigs | N 50    | No CDS | GC (%) | biosample accession |
|-------------|------------------|------------|---------|--------|--------|---------------------|
| MO00014/1   | 2093282          | 76         | 71108   | 2045   | 45.83  | SAMN18012326        |
| MO00020/1   | 2154157          | 90         | 78434   | 2096   | 50.66  | SAMN18012327        |
| MO00023/1   | 2148913          | 84         | 57100   | 2114   | 49.12  | SAMN18012328        |
| MO00038/1   | 2155886          | 76         | 67433   | 2113   | 52.46  | SAMN18012329        |
| MO00044/1.3 | 2123854          | 150        | 27442   | 2055   | 52.53  | SAMN18012330        |
| MO0003/1    | 2116072          | 58         | 79361   | 1986   | 49.55  | SAMN18012331        |
| MO00012/1   | 2325937          | 91         | 92210   | 2181   | 49.14  | SAMN18012332        |
| MO00015/1   | 2248695          | 74         | 82127   | 2127   | 48.92  | SAMN18012333        |
| MO00015/2   | 2278599          | 90         | 82313   | 2161   | 49.02  | SAMN18012334        |
| MO00021/1   | 2263795          | 93         | 66342   | 2125   | 49.17  | SAMN18012335        |
| MO00018/1   | 2475065          | 20         | 529403  | 2268   | 50.56  | SAMN18012336        |
| MO00032/1   | 2475385          | 20         | 529474  | 2273   | 52.77  | SAMN18012337        |
| MO00012/2   | 2767239          | 89         | 64117   | 2516   | 50.58  | SAMN18012338        |
| MO00029/2   | 2819881          | 48         | 168641  | 2528   | 48.74  | SAMN18012339        |
| MO00018/2   | 2762606          | 51         | 212926  | 2535   | 51.30  | SAMN18012340        |
| MO0003/2    | 2222383          | 11         | 496641  | 2102   | 50.92  | SAMN18012341        |
| MO0009/1    | 2332010          | 45         | 128194  | 2206   | 52.61  | SAMN18012342        |
| MO0009/2    | 2261404          | 17         | 422373  | 2137   | 49.22  | SAMN18012343        |
| MO00027/1   | 2247288          | 43         | 84192   | 2154   | 52.64  | SAMN18012344        |
| MO00027/2   | 2374291          | 43         | 194400  | 2277   | 51.54  | SAMN18012345        |
| MO00029/1   | 2194345          | 10         | 1186504 | 2018   | 51.60  | SAMN18012346        |
| MO00036/1   | 2291869          | 23         | 408621  | 2187   | 50.99  | SAMN18012347        |
| MO00036/2   | 2291659          | 21         | 408984  | 2187   | 52.76  | SAMN18012348        |
| MO00041/1   | 2221987          | 20         | 460972  | 2102   | 51.54  | SAMN18012349        |
| MO00045/1   | 2200796          | 23         | 276433  | 2061   | 49.03  | SAMN18012350        |
| MO00049/1   | 2424202          | 31         | 185666  | 2326   | 52.42  | SAMN18012351        |
