# Supplementary material for: WGS of Commensal Neisseria Reveals Acquisition of a New Ribosomal Protection Protein (MsrD) as a Possible Explanation for High Level Azithromycin Resistance in Belgium
Source: MDPI journal article supplement (doi:10.3390/pathogens10030384), 2021-03-23
Supplement: s1 [file s1]

|                    | Transmembrane domain                                                                                                 | Loop 3                                                                       | Transmembrane domain |
|--------------------|----------------------------------------------------------------------------------------------------------------------|------------------------------------------------------------------------------|----------------------|
| MO00014-1_Ng_346   | 89 TGWGNKQSFVGLKG--GFGTIRAGSLNSPLKNT                                                                                 | 89 NVNAWESGKFTGNVLEISGMAQREHRLSVRYDSDP-EFAGFSGSVQYAPKDNSGSGS-----NGES---YHVG |                      |
| MO00020-1_Ng_349   | 89 TGWGNKQSFVGLKG--GFGTIRVGSLSNPLKNTGANVNAWESGKYTGEFLEISKMARREHRLSARYDSDP-EFAGFSGSVQYAPKDNSGSGS-----NGES---YHVG      |                                                                              |                      |
| MO00023-1_Ng_347   | 89 TGWGNKQSFVGLKG--GFGTIRVGSLSNPLKNTGANVNAWESGKYTGEFLEISKMARREHRLSARYDSDP-EFAGFSGSVQYAPKDNSGSGS-----NGES---YHVG      |                                                                              |                      |
| MO00038-1_Ng_349   | 89 TGWGNKQSFVGLKG--GFGTIRVGSLSNPLKNTGANVNAWESGKYTGEFLEISKMARREHRLSARYDSDP-EFAGFSGSVQYAPKDNSGSGS-----NGES---YHVG      |                                                                              |                      |
| MO00044-1-3_Ng_348 | 89 TGWGNKQSFVGLKG--GFGTIRAGSLNSPLKNTGANVNAWESGKFTGNVLEISGMAKREHRLSVRYDSDP-EFAGFSGSVQYAPKDNSGSGS-----NGES---YHVG      |                                                                              |                      |
| MO0003-1_Nm_332    | 89 SGWGNRQSFVGLKG--GFGKLRVGRNLNVLKDTG-DINPWEW---KSDYLGVNKAIEPEARLISVRYDSDP-EFAGLSSGSVQYALNDNAGKH-----NSES---YHAG     |                                                                              |                      |
| MO00012-1_Nm_332   | 89 SGWGNRQSFVGLKG--GFGKLRVGRNLNVLKDTG-DINPWS---KSDYLGVNKAIEPEARLISVRYDSDP-EFAGLSSGSVQYALNDNAGKH-----NSES---YHAG      |                                                                              |                      |
| MO00015-1_Nm_330   | 89 SGWATRESFVGLG--GFGKLRVGRNLNVLKDTG-DINPWS---KSDYLGVNKAIEPEARLISVRYDSDP-EFAGLSSGSVQYALNDNAGRH-----NSES---YHAG       |                                                                              |                      |
| MO00015-2_Nm_330   | 89 SGWGNRQSFVGLKG--GFGKLRVGRNLNVLKDTG-DINPWS---KSDYLGVNKAIEPEARLISVRYDSDP-EFAGLSSGSVQYALNDNAGRH-----NSES---YHAG      |                                                                              |                      |
| MO00021-1_Nm_332   | 89 SGWGNRQSFVGLKG--GFGKLRVGRNLNVLKDTG-DINPWEW---KSDYLGVNKAIEPEARLISVRYDSDP-EFAGLSSGSVQYALNDNAGKH-----NSES---YHAG     |                                                                              |                      |
| MO00018-1_No_366   | 89 SGWATRESFVGLG--GFGKVRAGKLNLTQDK-MDKIDPWEY---KNPALGLGVFTRTGERVVSARYDSDP-VFAGFSANVQTPRDNQAEATGRNT-DYSDTSA---YYAG    |                                                                              |                      |
| MO00018-1_No_375   | 91 TNWGSRSFVGLG--GFGKIRAGHMLNLLNE-MDTIDTWLY---KSSALGLGAYVRTGSRTSVRYDSDP-SFGGLKANLQYSPRDNQPRDKNTHAEPGRDQ---YNVG       |                                                                              |                      |
| MO00032-1_No_366   | 89 SGWATRESFVGLG--GFGKVRAGKLNLTQDK-MDKIDPWEY---KNPALGLGVFTRTGERVVSARYDSDP-VFAGFSANVQTPRDNQAEATGRNT-DYSDTSA---YYAG    |                                                                              |                      |
| MO00032-1_No_375   | 91 TNWGSRSFVGLG--GFGKIRAGHMLNLLNE-MDTIDTWLY---KSSALGLGAYVRTGSRTSVRYDSDP-SFGGLKANLQYSPRDNQPRDKNTHAEPGRDQ---YNVG       |                                                                              |                      |
| MO00012-2_Nmu_328  | 82 NGWSTDSYIGLRG--DFGTVRAGWLSTPMHYLTGEQDAFNG---NNHTQTMGRMTFGGREIALNYESKTFDNGFNRYQTAPGANKYK-----DRKRGDWMAGLG          |                                                                              |                      |
| MO00012-2_Nmu_358  | 89 KGWGTRESFVGLG--GFGKVRAGKLNLTQDKNSDSDPWESSANASVLQFGKLRVDERKVSRYDSDP-VFAGFSASAVQYQPRDNANPEDKHVHDVKTTHS---FDLG       |                                                                              |                      |
| MO00012-2_Nmu_374  | 91 QRFGNRSFVGLG--NFGKVRAGNLNMLNE-MDTIDPWY---KTDAMGLGINTRTGVRITSLRYDSDP-SFGGKFKNVSYAPRDNANPEDKHVHDVKTTHS---YTAG       |                                                                              |                      |
| MO00029-2_Nmu_328  | 82 NGWSTDSYIGLRG--DFGTVRAGWLSTPMHYLTGEQDAFNG---NNHTQTMGRMTFGGREIALNYESKTFDNGFNRYQTAPGANKYK-----DRKRGDWMAGLG          |                                                                              |                      |
| MO00029-2_Nmu_358  | 89 KGWGTRESFVGLG--GFGKVRAGKLNLTQDKNSDSDPWESSANASVLQFGKLRVDERKVSRYDSDP-VFAGFSASAVQYQPRDNANPEDKHVHDVKTTHS---FDLG       |                                                                              |                      |
| MO00029-2_Nmu_374  | 91 QRFGNRSFVGLG--NFGKVRAGNLNMLNE-MDTIDPWY---KTDAMGLGINTRTGVRITSLRYDSDP-SFGGKFKNVSYAPRDNANPEDKHVHDVKTTHS---YTAG       |                                                                              |                      |
| MO00018-2_Nmu_328  | 82 NGWSTDSYIGLRG--DFGTVRAGWLSTPMHYLTGEQDAFNG---NNHTQTMGRMTFGGREIALNYESKTFDNGFNRYQTAPGANKYK-----DRKRGDWMAGLG          |                                                                              |                      |
| MO00018-2_Nmu_358  | 89 KGWGTRESFVGLG--GFGKVRAGKLNLTQDKNSDSDPWESSANASVLQFGKLRVDERKVSRYDSDP-VFAGFSASAVQYQPRDNANPEDKHVHDVKTTHS---FDLG       |                                                                              |                      |
| MO00018-2_Nmu_374  | 91 QRFGNRSFVGLG--NFGKVRAGNLNMLNE-MDTIDPWY---KTDAMGLGINTRTGVRITSLRYDSDP-SFGGKFKNVSYAPRDNANPEDKHVHDVKTTHS---YTAG       |                                                                              |                      |
| MO0003-2_Ns_332    | 61 GGWGTADSYVALNSYKNLGTVKMGYISTPMN--SIYLNPFDT---NSSILEFGKISRFGQRRVSMAYESP-WKNGQFQFKNVSPGSNAARNNDWNPDKKRGGDWVFGWG     |                                                                              |                      |
| MO0003-2_Ns_358    | 89 SGFANRESFVGLG--GFGKVRAGNLNLTQDKNSDSDPWESSANADTLQGLKIRVDRKVSRYDSDP-VLGGFSASVQYQPRDNANPEDKHVHDVKTTHS---YDLG         |                                                                              |                      |
| MO0003-2_Ns_372    | 89 QGFANRDSFVGLG--NFGKVRAGKLNLMNLTQDK-MDKIDPWEY---KTDAMGLGINTRTGVRITSLRYDSDP-SFGGKFKNVSYAPRDNANPEDKHVHDVKTTHS---YTAG |                                                                              |                      |
| MO0003-2_Ns_376    | 94 KEWASRESFVGLG--GFGKIRAGKLNLTQDKNSDSDPWESSANADTLQGLKIRVDRKVSRYDSDP-VLGGFSASVQYQPRDNANPEDKHVHDVKTTHS---YDLG         |                                                                              |                      |
| MO0009-1_Ns_354    | 85 SGFANRESFVGLG--GFGKVRAGKLNLTQDKNSDSDPWESSANADTLQGLKIRVDRKVSRYDSDP-VLGGFSASVQYQPRDNANPEDKHVHDVKTTHS---YDLG         |                                                                              |                      |
| MO0009-1_Ns_357    | 86 GGWGTADSYVALNSYKNLGTVKMGYISTPMN--SIYLNPFDT---NSSILEFGKISRFGQRRVSMAYESP-WKNGQFQFKNVSPGSNAARNNDWNPDKKRGGDWVFGWG     |                                                                              |                      |
| MO0009-1_Ns_372    | 94 KEWASRESFVGLG--GFGKVRAGKLNLTQDKNSDSDPWESSANADTLQGLKIRVDRKVSRYDSDP-VLGGFSASVQYQPRDNANPEDKHVHDVKTTHS---YDLG         |                                                                              |                      |
| MO0009-1_Ns_372    | 89 QGFANRDSFVGLG--NFGKVRAGKLNLMNLTQDK-MDKIDPWEY---KTDAMGLGINTRTGVRITSLRYDSDP-SFGGKFKNVSYAPRDNANPEDKHVHDVKTTHS---YTAG |                                                                              |                      |
| MO0009-2_Ns_357    | 86 GGWGTADSYVALNSYKNLGTVKMGYISTPMN--SIYLNPFDT---NSSILEFGKISRFGQRRVSMAYESP-WKNGQFQFKNVSPGSNAARNNDWNPDKKRGGDWVFGWG     |                                                                              |                      |
| MO0009-2_Ns_372    | 89 QGFATRDSFVGLG--NFGKIRAGKLNLMNLTQDK-MDKIDPWEY---KTDAMGLGINTRTGVRITSLRYDSDP-SFGGKFKNVSYAPRDNANPEDKHVHDVKTTHS---YTAG |                                                                              |                      |
| MO0009-2_Ns_372    | 95 SGFANRESFVGLG--GFGKVRAGNLNLTQDKNSDSDPWESSANADTLQGLKIRVDRKVSRYDSDP-VFAGFSASVQYQPRDNANPEDKHVHDVKTTHS---YDLG         |                                                                              |                      |
| MO0009-2_Ns_399    | 94 KEWASRESFVGLG--GFGKIRAGKLNLTQDKNSDSDPWESSANADTLQGLKIRVDRKVSRYDSDP-VLGGFSASVQYQPRDNANPEDKHVHDVKTTHS---YDLG         |                                                                              |                      |
| MO00027-1_Ns_342   | 59 QGFANRDSFVGLG--NFGKVRAGKLNLMNLTQDK-MDKIDPWEY---KTDAMGLGINTRTGVRITSLRYDSDP-SFGGKFKNVSYAPRDNANPEDKHVHDVKTTHS---YTAG |                                                                              |                      |
| MO00027-1_Ns_359   | 86 NGWGTADSYVALNSYKNLGTVKMGYISTPMN--SIYLNPFDT---NSSILEFGKISRFGQRRVSMAYESP-WKNGQFQFKNVSPGSNAARNNDWNPDKKRGGDWVFGWG     |                                                                              |                      |
| MO00027-1_Ns_378   | 100 SGFANRESFVGLG--GFGKVRAGNLNLTQDKNSDSDPWEAG-ANSDVLTGLKFERVDSREVSRYDSDP-VFAGFSASVQYQPRDNANPEDKHVHDVKTTHS---YDLG     |                                                                              |                      |
| MO00027-1_Ns_385   | 94 KEWASRESFVGLG--GFGKVRAGKLNLTQDKNSDSDPWESSANADTLQGLKIRVDRKVSRYDSDP-VFAGFSASVQYQPRDNANPEDKHVHDVKTTHS---YDLG         |                                                                              |                      |
| MO00027-2_Ns_354   | 85 SGFANRESFVGLG--GFGKVRAGNLNLTQDKNSDSDPWESSANADTLQGLKIRVDRKVSRYDSDP-VLGGFSASVQYQPRDNANPEDKHVHDVKTTHS---YDLG         |                                                                              |                      |
| MO00027-2_Ns_357   | 86 GGWGTADSYVALNSYKNLGTVKMGYISTPMN--SIYLNPFDT---NSSILEFGKISRFGQRRVSMAYESP-WKNGQFQFKNVSPGSNAARNNDWNPDKKRGGDWVFGWG     |                                                                              |                      |
| MO00027-2_Ns_372   | 89 QGFATRDSFVGLG--NFGKIRAGKLNLMNLTQDK-MDKIDPWEY---KTDAMGLGINTRTGVRITSLRYDSDP-SFGGKFKNVSYAPRDNANPEDKHVHDVKTTHS---YTAG |                                                                              |                      |
| MO00027-2_Ns_372   | 94 KEWASRESFVGLG--GFGKIRAGKLNLTQDKNSDSDPWESSANADTLQGLKIRVDRKVSRYDSDP-VLGGFSASVQYQPRDNANPEDKHVHDVKTTHS---YDLG         |                                                                              |                      |
| MO00029-1_Ns_354   | 85 SGFANRESFVGLG--GFGKVRAGNLNLTQDKNSDSDPWESSANADTLQGLKIRVDRKVSRYDSDP-VLGGFSASVQYQPRDNANPEDKHVHDVKTTHS---YDLG         |                                                                              |                      |
| MO00029-1_Ns_357   | 86 GGWGTADSYVALNSYKNLGTVKMGYISTPMN--SIYLNPFDT---NSSILEFGKISRFGQRRVSMAYESP-WKNGQFQFKNVSPGSNAARNNDWNPDKKRGGDWVFGWG     |                                                                              |                      |
| MO00029-1_Ns_372   | 89 QGFATRDSFVGLG--NFGKIRAGKLNLMNLTQDK-MDKIDPWEY---KTDAMGLGINTRTGVRITSLRYDSDP-SFGGKFKNVSYAPRDNANPEDKHVHDVKTTHS---YTAG |                                                                              |                      |
| MO00029-1_Ns_376   | 94 KEWASRESFVGLG--GFGKIRAGKLNLTQDKNSDSDPWESSANADTLQGLKIRVDRKVSRYDSDP-VLGGFSASVQYQPRDNANPEDKHVHDVKTTHS---YDLG         |                                                                              |                      |
| MO00036-1_Ns_357   | 86 GGWGTADSYVALNSYKNLGTVKMGYISTPMN--SIYLNPFDT---NSSILEFGKISRFGQRRVSMAYESP-WKNGQFQFKNVSPGSNAARNNDWNPDKKRGGDWVFGWG     |                                                                              |                      |
| MO00036-1_Ns_359   | 90 SGFANRESFVGLG--GFGKVRAGNLNLTQDKNSDSDPWESSANADTLQGLKIRVDRKVSRYDSDP-VLGGFSASVQYQPRDNANPEDKHVHDVKTTHS---YDLG         |                                                                              |                      |
| MO00036-1_Ns_372   | 89 QGFATRDSFVGLG--NFGKIRAGKLNLMNLTQDK-MDKIDPWEY---KTDAMGLGINTRTGVRITSLRYDSDP-SFGGKFKNVSYAPRDNANPEDKHVHDVKTTHS---YTAG |                                                                              |                      |
| MO00036-1_Ns_376   | 94 KEWASRESFVGLG--GFGKIRAGKLNLTQDKNSDSDPWESSANADTLQGLKIRVDRKVSRYDSDP-VLGGFSASVQYQPRDNANPEDKHVHDVKTTHS---YDLG         |                                                                              |                      |
| MO00036-2_Ns_357   | 86 GGWGTADSYVALNSYKNLGTVKMGYISTPMN--SIYLNPFDT---NSSILEFGKISRFGQRRVSMAYESP-WKNGQFQFKNVSPGSNAARNNDWNPDKKRGGDWVFGWG     |                                                                              |                      |
| MO00036-2_Ns_359   | 90 SGFANRESFVGLG--GFGKVRAGNLNLTQDKNSDSDPWESSANADTLQGLKIRVDRKVSRYDSDP-VLGGFSASVQYQPRDNANPEDKHVHDVKTTHS---YDLG         |                                                                              |                      |
| MO00036-2_Ns_372   | 89 QGFATRDSFVGLG--NFGKIRAGKLNLMNLTQDK-MDKIDPWEY---KTDAMGLGINTRTGVRITSLRYDSDP-SFGGKFKNVSYAPRDNANPEDKHVHDVKTTHS---YTAG |                                                                              |                      |
| MO00036-2_Ns_376   | 94 KEWASRESFVGLG--GFGKVRAGKLNLTQDKNSDSDPWESSANADTLQGLKIRVDRKVSRYDSDP-VLGGFSASVQYQPRDNANPEDKHVHDVKTTHS---YDLG         |                                                                              |                      |
| MO00041-1_Ns_354   | 85 SGFATRESFVGLG--GFGKVRAGKLNLTQDKNSDSDPWESSANADTLQGLKIRVDRKVSRYDSDP-VLGGFSASVQYQPRDNANPEDKHVHDVKTTHS---YDLG         |                                                                              |                      |
| MO00041-1_Ns_358   | 86 GGWGTADSYVALNSYKNLGTVKMGYISTPMN--SIYLNPFDT---NSSILEFGKISRFGQRRVSMAYESP-WKNGQFQFKNVSPGSNAARNNDWNPDKKRGGDWVFGWG     |                                                                              |                      |
| MO00041-1_Ns_372   | 89 QGFANRDSFVGLG--NFGKVRAGKLNLMNLTQDK-MDKIDPWEY---KTDAMGLGINTRTGVRITSLRYDSDP-SFGGKFKNVSYAPRDNANPEDKHVHDVKTTHS---YTAG |                                                                              |                      |
| MO00041-1_Ns_376   | 94 KEWASRESFVGLG--GFGKVRAGKLNLTQDKNSDSDPWESSANADTLQGLKIRVDRKVSRYDSDP-VLGGFSASVQYQPRDNANPEDKHVHDVKTTHS---YDLG         |                                                                              |                      |
| MO00045-1_Ns_354   | 85 SGFATRESFVGLG--GFGKVRAGKLNLTQDKNSDSDPWESSANADTLQGLKIRVDRKVSRYDSDP-VLGGFSASVQYQPRDNANPEDKHVHDVKTTHS---YDLG         |                                                                              |                      |
| MO00045-1_Ns_357   | 86 GGWGTADSYVALNSYKNLGTVKMGYISTPMN--SIYLNPFDT---NSSILEFGKISRFGQRRVSMAYESP-WKNGQFQFKNVSPGSNAARNNDWNPDKKRGGDWVFGWG     |                                                                              |                      |
| MO00045-1_Ns_372   | 89 QGFANRDSFVGLG--NFGKVRAGKLNLMNLTQDK-MDKIDPWEY---KTDAMGLGINTRTGVRITSLRYDSDP-SFGGKFKNVSYAPRDNANPEDKHVHDVKTTHS---YTAG |                                                                              |                      |
| MO00045-1_Ns_376   | 94 KEWASRESFVGLG--GFGKVRAGKLNLTQDKNSDSDPWESSANADTLQGLKIRVDRKVSRYDSDP-VLGGFSASVQYQPRDNANPEDKHVHDVKTTHS---YDLG         |                                                                              |                      |
| MO00049-1_Ns_354   | 85 SGFATRESFVGLG--GFGKVRAGKLNLTQDKNSDSDPWESSANADTLQGLKIRVDRKVSRYDSDP-VLGGFSASVQYQPRDNANPEDKHVHDVKTTHS---YDLG         |                                                                              |                      |
| MO00049-1_Ns_357   | 86 GGWGTADSYVALNSYKNLGTVKMGYISTPMN--SIYLNPFDT---NSSILEFGKISRFGQRRVSMAYESP-WKNGQFQFKNVSPGSNAARNNDWNPDKKRGGDWVFGWG     |                                                                              |                      |
| MO00049-1_Ns_372   | 89 QGFATRDSFVGLG--NFGKIRAGKLNLMNLTQDK-MDKIDPWEY---KTDAMGLGINTRTGVRITSLRYDSDP-SFGGKFKNVSYAPRDNANPEDKHVHDVKTTHS---YTAG |                                                                              |                      |
| MO00049-1_Ns_372   | 94 KEWASRESFVGLG--GFGKIRAGKLNLTQDKNSDSDPWESSANADTLQGLKIRVDRKVSRYDSDP-VLGGFSASVQYQPRDNANPEDKHVHDVKTTHS---YTAG         |                                                                              |                      |

**Supplemental Figure 2.** Alignment of loop 3 flanking regions of *porB* paralogs found in panel. Loop 3 is boxed (blue) with resistance associated *penB* mutants in *N. gonorrhoeae* strain MO00014-1 colored in red. Transmembrane domains are shaded in grey. Strain number with species; *N. gonorrhoeae* (Ng), *N. meningitidis* (Nm), *N. oralis* (No), *N. mucosa* (Nmu) and *N. subflava* (Ns) and number of amino acids of *porB*.
