# Supplementary material for: WGS of Commensal Neisseria Reveals Acquisition of a New Ribosomal Protection Protein (MsrD) as a Possible Explanation for High Level Azithromycin Resistance in Belgium
Source: MDPI journal article supplement (doi:10.3390/pathogens10030384), 2021-03-23
Supplement: s1 [file s1]

|                 |     |                                                                                 |
|-----------------|-----|---------------------------------------------------------------------------------|
| MO0003-2        | 481 | GTAGTAAAGTTGTTGAAACTGAAAGATACGTTTGAACCGTATATCGATACGTTAGCCGTGGCGCTTTAGATGCAAACGG |
| MO0027-1        | 481 | GTAGTAAAGTTGTTGAAACTGAAAGATACGTTTGAACCGTATATCGATACGTTAGCCGTGGCGCTTTAGATGCAAACGG |
| MO00027-2       | 481 | GTAGTTAAGTTGTTGAAACTGAAAGATACGTTTGAACCGTATATCGATACGTTAGCCGTGGCGCTTTAGATGCAAACGG |
| MO0009-2        | 481 | GTAGTTAAGTTGTTGAAACTGAAAGATACGTTTGAACCGTATATCGATACGTTAGCCGTGGCGCTTTAGATGCAAACGG |
| MO00029-1       | 481 | GTAGTTAAGTTGTTGAAACTGAAAGATACGTTTGAACCGTATATCGATACGTTAGCCGTGGCGCTTTAGATGCAAACGG |
| MO00036-1       | 481 | GTAGTTAAGTTGTTGAAACTGAAAGATACGTTTGAACCGTATATCGATACGTTAGCCGTGGCGCTTTAGATGCAAACGG |
| MO00036-2       | 481 | GTAGTTAAGTTGTTGAAACTGAAAGATACGTTTGAACCGTATATCGATACGTTAGCCGTGGCGCTTTAGATGCAAACGG |
| MO00041-1       | 481 | GTAGTTAAGTTGTTGAAACTGAAAGATACGTTTGAACCGTATATCGATACGTTAGCCGTGGCGCTTTAGATGCAAACGG |
| MO00049-1       | 481 | GTAGTTAAGTTGTTGAAACTGAAAGATACGTTTGAACCGTATATCGATACGTTAGCCGTGGCGCTTTAGATGCAAACGG |
| MO0009-1        | 481 | GTAGTTAAGTTGTTGAAACTGAAAGATACGTTTGAACCGTATATCGATACGTTAGCCGTGGTGCCTTGATGCAAACGG  |
| MO00045-1       | 481 | GTAGTTAAGTTGTTGAAACTGAAAGATACGTTTGAACCATATATCGATACGTTAGCCGTGGCGCTTTGATGCAAACGG  |
| 2006-3950 Strep | 1   |                                                                                 |

|                 |     |                                                                                 |
|-----------------|-----|---------------------------------------------------------------------------------|
| MO0003-2        | 961 | TGTAATCATTTGGTTTTTACTATCAGGTATTTAATTATTGGCATTGCTATAGTTTGCCAAATGATAACTGAGGTTAGAA |
| MO0027-1        | 961 | TGTAATCATTTGGTTTTTACTATCAGGTATTTAATTATTGGCATTGCTATAGTTTGCCAAATGATAACTGAGGTTAGAA |
| MO00027-2       | 961 | TGTAATCATTTGGTTTTTACTATCAGGTATTTAATTATTGGCATTGCTATAGTTTGCCAAATGATAACTGAGGTTAGAA |
| MO0009-2        | 961 | TGTAATCATTTGGTTTTTACTATCAGGTATTTAATTATTGGCATTGCTATAGTTTGCCAAATGATAACTGAGGTTAGAA |
| MO00029-1       | 961 | TGTAATCATTTGGTTTTTACTATCAGGTATTTAATTATTGGCATTGCTATAGTTTGCCAAATGATAACTGAGGTTAGAA |
| MO00036-1       | 961 | TGTAATCATTTGGTTTTTACTATCAGGTATTTAATTATTGGCATTGCTATAGTTTGCCAAATGATAACTGAGGTTAGAA |
| MO00036-2       | 961 | TGTAATCATTTGGTTTTTACTATCAGGTATTTAATTATTGGCATTGCTATAGTTTGCCAAATGATAACTGAGGTTAGAA |
| MO00041-1       | 961 | TGTAATCATTTGGTTTTTACTATCAGGTATTTAATTATTGGCATTGCTATAGTTTGCCAAATGATAACTGAGGTTAGAA |
| MO00049-1       | 961 | TGTAATCATTTGGTTTTTACTATCAGGTATTTAATTATTGGCATTGCTATAGTTTGCCAAATGATAACTGAGGTTAGAA |
| MO0009-1        | 721 | -----                                                                           |
| MO00045-1       | 721 | -----                                                                           |
| 2006-3950_Strep | 241 | TGTAATCATTTGGTTTTTACTATCAGGTATTTAATTATTGGCATTGCTATAGTTTGCCAAATGATAACTGAGGTTAGAA |

mefA 880-1218

|                 |      |                                                                                  |
|-----------------|------|----------------------------------------------------------------------------------|
| MO0003-2        | 1041 | AATTAGATTTAAAAATAACAATATTGGAGGAATATTTATGTATCTTATTTTCATGTAACTCTTCTGCTAAAAATCGCAGG |
| MO0027-1        | 1041 | AATTAGATTTAAAAATAACAATATTGGAGGAATATTTATGTATCTTATTTTCATGTAACTCTTCTGCTAAAAATCGCAGG |
| MO00027-2       | 1041 | AATTAGATTTAAAAATAACAATATTGGAGGAATATTTATGTATCTTATTTTCATGTAACTCTTCTGCTAAAAATCGCAGG |
| MO0009-2        | 1041 | AATTAGATTTAAAAATAACAATATTGGAGGAATATTTATGTATCTTATTTTCATGTAACTCTTCTGCTAAAAATCGCAGG |
| MO00029-1       | 1041 | AATTAGATTTAAAAATAACAATATTGGAGGAATATTTATGTATCTTATTTTCATGTAACTCTTCTGCTAAAAATCGCAGG |
| MO00036-1       | 1041 | AATTAGATTTAAAAATAACAATATTGGAGGAATATTTATGTATCTTATTTTCATGTAACTCTTCTGCTAAAAATCGCAGG |
| MO00036-2       | 1041 | AATTAGATTTAAAAATAACAATATTGGAGGAATATTTATGTATCTTATTTTCATGTAACTCTTCTGCTAAAAATCGCAGG |
| MO00041-1       | 1041 | AATTAGATTTAAAAATAACAATATTGGAGGAATATTTATGTATCTTATTTTCATGTAACTCTTCTGCTAAAAATCGCAGG |
| MO00049-1       | 1041 | AATTAGATTTAAAAATAACAATATTGGAGGAATATTTATGTATCTTATTTTCATGTAACTCTTCTGCTAAAAATCGCAGG |
| MO0009-1        | 721  | -----                                                                            |
| MO00045-1       | 721  | -----                                                                            |
| 2006-3950_Strep | 321  | AATTAGATTTAAAAATAACAATATTGGAGGAATATTTATGTATCTTATTTTCATGTAACTCTTCTGCTAAAAATCGCAGG |

mefA 880-1218

Regulatory sequence motif MYLIMF

|                 |      |                                                                                 |
|-----------------|------|---------------------------------------------------------------------------------|
| MO0003-2        | 1121 | GTTTTCCTGCATACAAGCAAATGAAAGCATGCGATTATAGACAGGAGGAAATGTTATGGAATTAATATTTAAAGCAAAA |
| MO0027-1        | 1121 | GTTTTCCTGCATACAAGCAAATGAAAGCATGCGATTATAGACAGGAGGAAATGTTATGGAATTAATATTTAAAGCAAAA |
| MO00027-2       | 1121 | GTTTTCCTGCATACAAGCAAATGAAAGCATGCGATTATAGACAGGAGGAAATGTTATGGAATTAATATTTAAAGCAAAA |
| MO0009-2        | 1121 | GTTTTCCTGCATACAAGCAAATGAAAGCATGCGATTATAGACAGGAGGAAATGTTATGGAATTAATATTTAAAGCAAAA |
| MO00029-1       | 1121 | GTTTTCCTGCATACAAGCAAATGAAAGCATGCGATTATAGACAGGAGGAAATGTTATGGAATTAATATTTAAAGCAAAA |
| MO00036-1       | 1121 | GTTTTCCTGCATACAAGCAAATGAAAGCATGCGATTATAGACAGGAGGAAATGTTATGGAATTAATATTTAAAGCAAAA |
| MO00036-2       | 1121 | GTTTTCCTGCATACAAGCAAATGAAAGCATGCGATTATAGACAGGAGGAAATGTTATGGAATTAATATTTAAAGCAAAA |
| MO00041-1       | 1121 | GTTTTCCTGCATACAAGCAAATGAAAGCATGCGATTATAGACAGGAGGAAATGTTATGGAATTAATATTTAAAGCAAAA |
| MO00049-1       | 1121 | GTTTTCCTGCATACAAGCAAATGAAAGCATGCGATTATAGACAGGAGGAAATGTTATGGAATTAATATTTAAAGCAAAA |
| MO0009-1        | 721  | -----                                                                           |
| MO00045-1       | 721  | -----                                                                           |
| 2006-3950_Strep | 401  | GTTTTCCTGCATACAAGCAAATGAAAGCATGCGATTATAGACAGGAGGAAATGTTATGGAATTAATATTTAAAGCAAAA |

Msr(D)

|                 |      |                                                                                  |
|-----------------|------|----------------------------------------------------------------------------------|
| MO0003-2        | 1201 | GACATTCGTGTGGAATTCAAAGGACGCGATGTTTTAGATATAAATGAATTAGAAGTATATGATTATGACCGTATTGGTTT |
| MO0027-1        | 1201 | GACATTCGTGTGGAATTCAAAGGACGCGATGTTTTAGATATAAATGAATTAGAAGTATATGATTATGACCGTATTGGTTT |
| MO00027-2       | 1201 | GACATTCGTGTGGAATTCAAAGGACGCGATGTTTTAGATATAAATGAATTAGAAGTATATGATTATGACCGTATTGGTTT |
| MO0009-2        | 1201 | GACATTCGTGTGGAATTCAAAGGACGCGATGTTTTAGATATAAATGAATTAGAAGTATATGATTATGACCGTATTGGTTT |
| MO00029-1       | 1201 | GACATTCGTGTGGAATTCAAAGGACGCGATGTTTTAGATATAAATGAATTAGAAGTATATGATTATGACCGTATTGGTTT |
| MO00036-1       | 1201 | GACATTCGTGTGGAATTCAAAGGACGCGATGTTTTAGATATAAATGAATTAGAAGTATATGATTATGACCGTATTGGTTT |
| MO00036-2       | 1201 | GACATTCGTGTGGAATTCAAAGGACGCGATGTTTTAGATATAAATGAATTAGAAGTATATGATTATGACCGTATTGGTTT |
| MO00041-1       | 1201 | GACATTCGTGTGGAATTCAAAGGACGCGATGTTTTAGATATAAATGAATTAGAAGTATATGATTATGACCGTATTGGTTT |
| MO00049-1       | 1201 | GACATTCGTGTGGAATTCAAAGGACGCGATGTTTTAGATATAAATGAATTAGAAGTATATGATTATGACCGTATTGGTTT |
| MO0009-1        | 721  | -----                                                                            |
| MO00045-1       | 721  | -----                                                                            |
| 2006-3950_Strep | 481  | GACATTCGTGTGGAATTCAAAGGACGCGATGTTTTAGATATAAATGAATTAGAAGTATATGATTATGACCGTATTGGTTT |

Msr(D)

|                 |      |                                                                               |
|-----------------|------|-------------------------------------------------------------------------------|
| MO0003-2        | 1281 | AGTAGGAGCAAATGGTGCTGGAAAAAGCACTTTACTCAGGGTACTTTTAGGAGAATTAACCCCCAGGATGTAAATGA |
| MO0027-1        | 1281 | AGTAGGAGCAAATGGTGCTGGAAAAAGCACTTTACTCAGGGTACTTTTAGGAGAATTAACCCCCAGGATGTAAATGA |
| MO00027-2       | 1281 | AGTAGGAGCAAATGGTGCTGGAAAAAGCACTTTACTCAGGGTACTTTTAGGAGAATTAACCCCCAGGATGTAAATGA |
| MO0009-2        | 1281 | AGTAGGAGCAAATGGTGCTGGAAAAAGCACTTTACTCAGGGTACTTTTAGGAGAATTAACCCCCAGGATGTAAATGA |
| MO00029-1       | 1281 | AGTAGGAGCAAATGGTGCTGGAAAAAGCACTTTACTCAGGGTACTTTTAGGAGAATTAACCCCCAGGATGTAAATGA |
| MO00036-1       | 1281 | AGTAGGAGCAAATGGTGCTGGAAAAAGCACTTTACTCAGGGTACTTTTAGGAGAATTAACCCCCAGGATGTAAATGA |
| MO00036-2       | 1281 | AGTAGGAGCAAATGGTGCTGGAAAAAGCACTTTACTCAGGGTACTTTTAGGAGAATTAACCCCCAGGATGTAAATGA |
| MO00041-1       | 1281 | AGTAGGAGCAAATGGTGCTGGAAAAAGCACTTTACTCAGGGTACTTTTAGGAGAATTAACCCCCAGGATGTAAATGA |
| MO00049-1       | 1281 | AGTAGGAGCAAATGGTGCTGGAAAAAGCACTTTACTCAGGGTACTTTTAGGAGAATTAACCCCCAGGATGTAAATGA |
| MO0009-1        | 721  | -----                                                                         |
| MO00045-1       | 721  | -----                                                                         |
| 2006-3950_Strep | 561  | AGTAGGAGCAAATGGTGCTGGAAAAAGCACTTTACTCAGGGTACTTTTAGGAGAATTAACCCCCAGGATGTAAATGA |

Msr(D)

|                 |      |                                                                                  |
|-----------------|------|----------------------------------------------------------------------------------|
| MO0003-2        | 1361 | ATCGTCTGGGTGAACCTTGCCATATATCCCCAGTTGGACGAAGTAACCTGCAGGAGGAAAAAGATTTTGCACCTGTAGGC |
| MO0027-1        | 1361 | ATCGTCTGGGTGAACCTTGCCATATATCCCCAGTTGGACGAAGTAACCTGCAGGAGGAAAAAGATTTTGCACCTGTAGGC |
| MO00027-2       | 1361 | ATCGTCTGGGTGAACCTTGCCATATATCCCCAGTTGGACGAAGTAACCTGCAGGAGGAAAAAGATTTTGCACCTGTAGGC |
| MO0009-2        | 1361 | ATCGTCTGGGTGAACCTTGCCATATATCCCCAGTTGGACGAAGTAACCTGCAGGAGGAAAAAGATTTTGCACCTGTAGGC |
| MO00029-1       | 1361 | ATCGTCTGGGTGAACCTTGCCATATATCCCCAGTTGGACGAAGTAACCTGCAGGAGGAAAAAGATTTTGCACCTGTAGGC |
| MO00036-1       | 1361 | ATCGTCTGGGTGAACCTTGCCATATATCCCCAGTTGGACGAAGTAACCTGCAGGAGGAAAAAGATTTTGCACCTGTAGGC |
| MO00036-2       | 1361 | ATCGTCTGGGTGAACCTTGCCATATATCCCCAGTTGGACGAAGTAACCTGCAGGAGGAAAAAGATTTTGCACCTGTAGGC |
| MO00041-1       | 1361 | ATCGTCTGGGTGAACCTTGCCATATATCCCCAGTTGGACGAAGTAACCTGCAGGAGGAAAAAGATTTTGCACCTGTAGGC |
| MO00049-1       | 1361 | ATCGTCTGGGTGAACCTTGCCATATATCCCCAGTTGGACGAAGTAACCTGCAGGAGGAAAAAGATTTTGCACCTGTAGGC |
| MO0009-1        | 721  | -----                                                                            |
| MO00045-1       | 721  | -----                                                                            |
| 2006-3950_Strep | 641  | ATCGTCTGGGTGAACCTTGCCATATATCCCCAGTTGGACGAAGTAACCTGCAGGAGGAAAAAGATTTTGCACCTGTAGGC |

Msr(D)





|                 |      |                                                                                  |
|-----------------|------|----------------------------------------------------------------------------------|
| MO0003-2        | 2401 | TTAAGCGGTGGAGAAATTATAAAATTGTTGCTTGCTAAAATGCTCATGGGTAGATATAACATCCTAATAATGGATGAACC |
| MO0027-1        | 2401 | TTAAGCGGTGGAGAAATTATAAAATTGTTGCTTGCTAAAATGCTCATGGGTAGATATAACATCCTAATAATGGATGAACC |
| MO00027-2       | 2401 | TTAAGCGGTGGAGAAATTATAAAATTGTTGCTTGCTAAAATGCTCATGGGTAGATATAACATCCTAATAATGGATGAACC |
| MO0009-2        | 2401 | TTAAGCGGTGGAGAAATTATAAAATTGTTGCTTGCTAAAATGCTCATGGGTAGATATAACATCCTAATAATGGATGAACC |
| MO00029-1       | 2401 | TTAAGCGGTGGAGAAATTATAAAATTGTTGCTTGCTAAAATGCTCATGGGTAGATATAACATCCTAATAATGGATGAACC |
| MO00036-1       | 2401 | TTAAGCGGTGGAGAAATTATAAAATTGTTGCTTGCTAAAATGCTCATGGGTAGATATAACATCCTAATAATGGATGAACC |
| MO00036-2       | 2401 | TTAAGCGGTGGAGAAATTATAAAATTGTTGCTTGCTAAAATGCTCATGGGTAGATATAACATCCTAATAATGGATGAACC |
| MO00041-1       | 2401 | TTAAGCGGTGGAGAAATTATAAAATTGTTGCTTGCTAAAATGCTCATGGGTAGATATAACATCCTAATAATGGATGAACC |
| MO00049-1       | 2401 | TTAAGCGGTGGAGAAATTATAAAATTGTTGCTTGCTAAAATGCTCATGGGTAGATATAACATCCTAATAATGGATGAACC |
| MO0009-1        | 721  | -----                                                                            |
| MO00045-1       | 721  | -----                                                                            |
| 2006-3950_Strep | 1681 | TTAAGCGGTGGAGAAATTATAAAATTGTTGCTTGCTAAAATGCTCATGGGTAGATATAACATCCTAATAATGGATGAACC |

$$\text{Msr}(\mathcal{D})$$

|                 |      |                                                                                 |
|-----------------|------|---------------------------------------------------------------------------------|
| MO0003-2        | 2481 | CAGTAACTTCCTTGACATACCAAGTTTAGAGGCTTTGGAATACTAATGAAGGAGTACACCGGAACTATCGTGTTTATCA |
| MO0027-1        | 2481 | CAGTAACTTCCTTGACATACCAAGTTTAGAGGCTTTGGAATACTAATGAAGGAGTACACCGGAACTATCGTGTTTATCA |
| MO00027-2       | 2481 | CAGTAACTTCCTTGACATACCAAGTTTAGAGGCTTTGGAATACTAATGAAGGAGTACACCGGAACTATCGTGTTTATCA |
| MO0009-2        | 2481 | CAGTAACTTCCTTGACATACCAAGTTTAGAGGCTTTGGAATACTAATGAAGGAGTACACCGGAACTATCGTGTTTATCA |
| MO00029-1       | 2481 | CAGTAACTTCCTTGACATACCAAGTTTAGAGGCTTTGGAATACTAATGAAGGAGTACACCGGAACTATCGTGTTTATCA |
| MO00036-1       | 2481 | CAGTAACTTCCTTGACATACCAAGTTTAGAGGCTTTGGAATACTAATGAAGGAGTACACCGGAACTATCGTGTTTATCA |
| MO00036-2       | 2481 | CAGTAACTTCCTTGACATACCAAGTTTAGAGGCTTTGGAATACTAATGAAGGAGTACACCGGAACTATCGTGTTTATCA |
| MO00041-1       | 2481 | CAGTAACTTCCTTGACATACCAAGTTTAGAGGCTTTGGAATACTAATGAAGGAGTACACCGGAACTATCGTGTTTATCA |
| MO00049-1       | 2481 | CAGTAACTTCCTTGACATACCAAGTTTAGAGGCTTTGGAATACTAATGAAGGAGTACACCGGAACTATCGTGTTTATCA |
| MO0009-1        | 721  | -----                                                                           |
| MO00045-1       | 721  | -----                                                                           |
| 2006-3950 Strep | 1761 | CAGTAACTTCCTTGACATACCAAGTTTAGAGGCTTTGGAATACTAATGAAGGAGTACACCGGAACTATCGTGTTTATCA |

 $\text{Msr}(\mathbf{D})$ 

|                 |      |                                                                                |     |
|-----------------|------|--------------------------------------------------------------------------------|-----|
| MO0003-2        | 2561 | CCCACGATAAACGATTACTCGAAAATGTAGCAGATGTAGTTTATGAAATTAGAGATAAGAAAAATAAATCTGAAACAT | TAA |
| MO0027-1        | 2561 | CCCACGATAAACGATTACTCGAAAATGTAGCAGATGTAGTTTATGAAATTAGAGATAAGAAAAATAAATCTGAAACAT | TAA |
| MO00027-2       | 2561 | CCCACGATAAACGATTACTCGAAAATGTAGCAGATGTAGTTTATGAAATTAGAGATAAGAAAAATAAATCTGAAACAT | TAA |
| MO0009-2        | 2561 | CCCACGATAAACGATTACTCGAAAATGTAGCAGATGTAGTTTATGAAATTAGAGATAAGAAAAATAAATCTGAAACAT | TAA |
| MO00029-1       | 2561 | CCCACGATAAACGATTACTCGAAAATGTAGCAGATGTAGTTTATGAAATTAGAGATAAGAAAAATAAATCTGAAACAT | TAA |
| MO00036-1       | 2561 | CCCACGATAAACGATTACTCGAAAATGTAGCAGATGTAGTTTATGAAATTAGAGATAAGAAAAATAAATCTGAAACAT | TAA |
| MO00036-2       | 2561 | CCCACGATAAACGATTACTCGAAAATGTAGCAGATGTAGTTTATGAAATTAGAGATAAGAAAAATAAATCTGAAACAT | TAA |
| MO00041-1       | 2561 | CCCACGATAAACGATTACTCGAAAATGTAGCAGATGTAGTTTATGAAATTAGAGATAAGAAAAATAAATCTGAAACAT | TAA |
| MO00049-1       | 2561 | CCCACGATAAACGATTACTCGAAAATGTAGCAGATGTAGTTTATGAAATTAGAGATAAGAAAAATAAATCTGAAACAT | TAA |
| MO0009-1        | 721  | -----                                                                          |     |
| MO00045-1       | 721  | -----                                                                          |     |
| 2006-3950 Strep | 1841 | CCCACGATAAACGATTACTCGAAAATGTAGCAGATGTAGTTTATGAAATTAGAGATAAGAAAAATAAATCTGAAACAT | TAA |

 $\text{Msr}(\mathcal{D})$ 

|                 |      |                                                                                  |
|-----------------|------|----------------------------------------------------------------------------------|
| MO0003-2        | 2641 | ATTTAAGGTAGTCGCTGGTCAGTATTGATTCTAATAAAGGCTGTTTGAATGATTTTCAGACGGGCTTTATTGTTTTATAT |
| MO0027-1        | 2641 | ATTTAAGGTAGTCGCTGGTCAGTATTGATTCTAATAAAGGCTGTTTGAATGATTTTCAGACGGGCTTTATTGTTTTATAT |
| MO00027-2       | 2641 | ATTTAAGGTAGTCGCTGGTCAGTATTGATTCTAATAAAGGCTGTTTGAATGATTTTCAGACGGGCTTTATTGTTTTATAT |
| MO0009-2        | 2641 | ATTTAAGGTAGTCGCTGGTCAGTATTGATTCTAATAAAGGCTGTTTGAATGATTTTCAGACGGGCTTTATTGTTTTATAT |
| MO00029-1       | 2641 | ATTTAAGGTAGTCGCTGGTCAGTATTGATTCTAATAAAGGCTGTTTGAATGATTTTCAGACGGGCTTTATTGTTTTATAT |
| MO00036-1       | 2641 | ATTTAAGGTAGTCGCTGGTCAGTATTGATTCTAATAAAGGCTGTTTGAATGATTTTCAGACGGGCTTTATTGTTTTATAT |
| MO00036-2       | 2641 | ATTTAAGGTAGTCGCTGGTCAGTATTGATTCTAATAAAGGCTGTTTGAATGATTTTCAGACGGGCTTTATTGTTTTATAT |
| MO00041-1       | 2641 | ATTTAAGGTAGTCGCTGGTCAGTATTGATTCTAATAAAGGCTGTTTGAATGATTTTCAGACGGGCTTTATTGTTTTATAT |
| MO00049-1       | 2641 | ATTTAAGGTAGTCGCTGGTCAGTATTGATTCTAATAAAGGCTGTTTGAATGATTTTCAGACGGGCTTTATTGTTTTATAT |
| MO0009-1        | 721  | -----ATTGATTCTAATAAAGGCTGTTTGAATGATTTTCAGACGGGCTTTATTGTTTTATAT                   |
| MO00045-1       | 721  | -----ATTGATTCTAATAAAGGCTGTTTGAATGATTTTCAGACGGGCTTTATTGTTTTATAT                   |
| 2006-3950 Strep | 1921 | ATTTAAGGTAGTCGCTGGTCAGTA                                                         |

|           |       |                                                                               |
|-----------|-------|-------------------------------------------------------------------------------|
| MO0003-2  | 2721  | TGCTTTCAAATATCAGAATCTTGATTGCAAATGATTCTATGAAATAGCCGTAATGTTATACTTAGCCTCTTGTTGGC |
| MO0027-1  | 2721  | TGCTTTCAAATATCAGAATCTTGATTGCAAATGATTCTATGAAATAGCCGTAATGTTATACTTAGCCTCTTGTTGGC |
| MO00027-2 | 2721  | TGCTTTCAAATATCAGAATCTTGATTGCAAATGATTCTATGAAATAGCCGTAATGTTATACTTAGCCTCTTGTTGGC |
| MO0009-2  | 2721  | TGCTTTCAAATATCAGAATCTTGATTGCAAATGATTCTATGAAATAGCCGTAATGTTATACTTAGCCTCTTGTTGGC |
| MO00029-1 | 2721  | TGCTTTCAAATATCAGAATCTTGATTGCAAATGATTCTATGAAATAGCCGTAATGTTATACTTAGCCTCTTGTTGGC |
| MO00036-1 | 2721  | TGCTTTCAAATATCAGAATCTTGATTGCAAATGATTCTATGAAATAGCCGTAATGTTATACTTAGCCTCTTGTTGGC |
| MO00036-2 | 2721  | TGCTTTCAAATATCAGAATCTTGATTGCAAATGATTCTATGAAATAGCCGTAATGTTATACTTAGCCTCTTGTTGGC |
| MO00041-1 | 2721  | TGCTTTCAAATATCAGAATCTTGATTGCAAATGATTCTATGAAATAGCCGTAATGTTATACTTAGCCTCTTGTTGGC |
| MO00049-1 | 2721  | TGCTTTCAAATATCAGAATCTTGATTGCAAATGATTCTATGAAATAGCCGTAATGTTATACTTAGCCTCTTGTTGGC |
| MO0009-1  | 778   | TGCTTTCAAATATCAGAATCTTGATTGCAAATGATTCTATGAAATAGCCGTAATGTTATACTTAGCCTCTTGTTGGC |
| MO00045-1 | 778   | TGCGTTCAAATATCAGAATCTTGATTGCAAATGATTCTATGAAATAGCCGTAATGTTATACTTAGCCTCTTGTTGGC |
| 2006-3950 | Strep | -----                                                                         |

|                 |      |                                                                                 |
|-----------------|------|---------------------------------------------------------------------------------|
| MO0003-2        | 2801 | GATTGGGAAGAAACAGTCATTAGATAATGCGGATAGATGCCGCCTTTTCATGGCAGACTGAGGTTTTTAAATAAATGTA |
| MO0027-1        | 2801 | GATTGGGAAGAAACAGTCATTAGATAATGCGGATAGATGCCGCCTTTTCATGGCAGACTGAGGTTTTTAAATAAATGTA |
| MO00027-2       | 2801 | GATTGGGAAGAAACAGTCATTAGATAATGCGGATAGATGCCGCCTTTTCATGGCAGACTGAGGTTTTTAAATAAATGTA |
| MO0009-2        | 2801 | GATTGGGAAGAAACAGTCATTAGATAATGCGGATAGATGCCGCCTTTTCATGGCAGACTGAGGTTTTTAAATAAATGTA |
| MO00029-1       | 2801 | GATTGGGAAGAAACAGTCATTAGATAATGCGGATAGATGCCGCCTTTTCATGGCAGACTGAGGTTTTTAAATAAATGTA |
| MO00036-1       | 2801 | GATTGGGAAGAAACAGTCATTAGATAATGCGGATAGATGCCGCCTTTTCATGGCAGACTGAGGTTTTTAAATAAATGTA |
| MO00036-2       | 2801 | GATTGGGAAGAAACAGTCATTAGATAATGCGGATAGATGCCGCCTTTTCATGGCAGACTGAGGTTTTTAAATAAATGTA |
| MO00041-1       | 2801 | GATTGGGAAGAAACAGTCATTAGATAATGCGGATAGATGCCGCCTTTTCATGGCAGACTGAGGTTTTTAAATAAATGTA |
| MO00049-1       | 2801 | GATTGGGAAGAAACAGTCATTAGATAATGCGGATGATGCCGCCTTTTCATGGCAGACTGAGGTTTTTAAACAAATGTA  |
| MO0009-1        | 858  | GATTGGGAAGAAACAGTCATTAGATAATGCGGATAAATGCCGCCTTTTCATGGCAGACTGAGGTTTTTAAATAAATGTA |
| MO00045-1       | 858  | GATTGGGAAGAAACAGTCATTGGATAATGCGGATAGATGCCGCCTTTTCATGGCAGACTGAGGTTTTTAAACAAATGTA |
| 2006-3950 Strep |      | -----                                                                           |

MO0003-2 2881 ACGGTAGAATAAACAGGCTGCCGGACAACATTCAAATCGATGAAATGGATAGCAGAAAATGAGCAGAATCCAACAAACTT  
MO0027-1 2881 ACGGTAGAATAAACAGGCTGCCGGACAACATTCAAATCGATGAAATGGATAGCAGAAAATGAGCAGAATCCAACAAACTT  
MO00027-2 2881 ACGGTAGAATAAACAGGCTGCCGGACAACATTCAAATCGATGAAATGGATAGCAGAAAATGAGCAGAATCCAACAAACTT  
MO0009-2 2881 ACGGTAGAATAAACAGGCTGCCGGACAACATTCAAATCGATGAAATGGATAGCAGAAAATGAGCAGAATCCAACAAACTT  
MO00029-1 2881 ACGGTAGAATAAACAGGCTGCCGGACAACATTCAAATCGATGAAATGGATAGCAGAAAATGAGCAGAATCCAACAAACTT  
MO00036-1 2881 ACGGTAGAATAAACAGGCTGCCGGACAACATTCAAATCGATGAAATGGATAGCAGAAAATGAGCAGAATCCAACAAACTT  
MO00036-2 2881 ACGGTAGAATAAACAGGCTGCCGGACAACATTCAAATCGATGAAATGGATAGCAGAAAATGAGCAGAATCCAACAAACTT  
MO00041-1 2881 ACGGTAGAATAAACAGGCTGCCGGACAACATTCAAATCGATGAAATGGATAGCAGAAAATGAGCAGAATCCAACAAACTT  
MO00049-1 2881 ACGGCAGAATAAAATAGGCTGCCGGACAACATTCAAATCGATGAAATGGATAGCAGGAATGAGCAGAATCCAACAAACTT  
MO0009-1 938 ACGGCAGAATAAACAGGCTGCCGGACAACATTCAAATCGATGAAATGGATAGCAGGAATGAGCAGAATCCAACAAACTT  
MO00045-1 938 ACGGCAGCATAAACAGGCTGCCGGACAACATTCAAATCGATGAAATGGATAGCAGAAAATGAGCAGAATCCAACAACTT  
2006-3950\_Strep -----

trpA

MO0003-2 2961 TTTCAGCGCTCAATGGCGCAAAGCACTGATTCCTTATATTACGGTGGGTGATCCCAACCTTGAGACGACCTGGCATTG  
MO0027-1 2961 TCTCAGCGCTCAATGGCGCAAAGCACTGATTCCTTATATTACGGTGGGTGATCCCAACCTTGAGACGACCTGGCATTG  
MO00027-2 2961 TCTCAGCGCTCAATGGCGCAAAGCACTGATTCCTTATATTACGGTGGGTGATCCCAACCTTGAGACGACCTGGCATTG  
MO0009-2 2961 TCTCAGCGCTCAATGGCGCAAAGCACTGATTCCTTATATTACGGTGGGTGATCCCAACCTTGAGACACCTTGGCATTG  
MO00029-1 2961 TCTCAGCGCTCAATGGCGCAAAGCACTGATTCCTTATATTACGGTGGGTGATCCCAACCTTGAGACGACCTGGCATTG  
MO00036-1 2961 TCTCAGCGCTCAATGGCGCAAAGCACTGATTCCTTATATTACGGTGGGTGATCCCAACCTTGAGACGACCTGGCATTG  
MO00036-2 2961 TCTCAGCGCTCAATGGCGCAAAGCACTGATTCCTTATATTACGGTGGGTGATCCCAACCTTGAGACGACCTGGCATTG  
MO00041-1 2961 TCTCAGCGCTCAATGGCGCAAAGCACTGATTCCTTATATTACGGTGGGTGATCCCAACCTTGAGACGACCTGGCATTG  
MO00049-1 2961 TCTCAGCGCTCAATGGCGCAAAGCACTGATTCCTTATATTACGGTGGGTGATCCCAACCTTGAGACGACCTGGCATTG  
MO0009-1 1018 TCTCAGCGCTCAATGGCGCAAAGCACTGATTCCTTATATTACGGTGGGTGATCCCAAGTCTTGAGACACCTTGGCATTG  
MO00045-1 1018 TCTCAGCGCTCAATGGCGCAAAGCACTGATTCCTTATATTACGGTGGGCATCCCAACCTTGAGACACCTTGGCATTG  
2006-3950\_Strep -----

trpA

MO0003-2 3041 ATGCACAGCCTGGTAGCTAACGGTGTCTGATATTTTGAACCTGGGTGTGCCGTTTTCTGACCCGATGGCGGATGGTCCGAC  
MO0027-1 3041 ATGCACAGCCTGGTAGCTAACGGTGTCTGATATTTTGAACCTGGGTGTGCCGTTTTCTGACCCGATGGCGGATGGTCCGAC  
MO00027-2 3041 ATGCACAGCCTGGTAGCTAACGGTGTCTGATATTTTGAACCTGGGTGTGCCGTTTTCTGACCCGATGGCGGATGGTCCGAC  
MO0009-2 3041 ATGCACAGCCTGGTAGCTAACGGTGTCTGATATTTTGAACCTGGGTGTGCCGTTTTCTGACCCGATGGCGGATGGTCCGAC  
MO00029-1 3041 ATGCACAGCCTGGTAGCTAACGGTGTCTGATATTTTGAACCTGGGTGTGCCGTTTTCTGACCCGATGGCGGATGGTCCGAC  
MO00036-1 3041 ATGCACAGCCTGGTAGCTAACGGTGTCTGATATTTTGAACCTGGGTGTGCCGTTTTCTGACCCGATGGCGGATGGTCCGAC  
MO00036-2 3041 ATGCACAGCCTGGTAGCTAACGGTGTCTGATATTTTGAACCTGGGTGTGCCGTTTTCTGACCCGATGGCGGATGGTCCGAC  
MO00041-1 3041 ATGCACAGCCTGGTAGCTAACGGTGTCTGATATTTTGAACCTGGGTGTGCCGTTTTCTGACCCGATGGCGGATGGTCCGAC  
MO00049-1 3041 ATGCACAGCCTGGTGGCTAATGGTGTCTGATATTTTGAACCTGGGTGTGCCGTTTTCTGACCCGATGGCGGATGGTCCGAC  
MO0009-1 1098 ATGCA TAGCCTGGTGGCTAATGGTGTCTGATATTTTGAACCTGGGTGTGCCGTTTTCTGACCCGATGGCGGATGGTCCGAC  
MO00045-1 1098 ATGCA TAGCCTGGTGGCTAATGGTGTCTGATATTTTGAACCTGGGTGTGCCGTTTTCTGACCCGATGGCGGATGGCCCGAC  
2006-3950\_Strep -----

trpA

MO0003-2 3121 CATTACAGCTGCGGCCGAAAGGGCGTTGGCAAATCATGTTTCTTTGCACGACGTATTGAAACAGTACGCTTGTTCCGCC  
MO0027-1 3121 CATTACAGCTGCGGCCGAAAGGGCGTTGGCAAATCATGTTTCTTTGCACGACGTATTGAAACAGTACGCTTGTTCCGCC  
MO00027-2 3121 CATTACAGCTGCGGCCGAAAGGGCGTTGGCAAATCATGTTTCTTTGCACGACGTATTGAAACAGTACGCTTGTTCCGCC  
MO0009-2 3121 CATTACAGCTGCGGCCGAAAGGGCGTTGGCAAATCATGTTTCTTTGCACGACGTATTGAAACAGTACGCTTGTTCCGCC  
MO00029-1 3121 CATTACAGCTGCGGCCGAAAGGGCGTTGGCAAATCATGTTTCTTTGCACGACGTATTGAAACAGTACGCTTGTTCCGCC  
MO00036-1 3121 CATTACAGCTGCGGCCGAAAGGGCGTTGGCAAATCATGTTTCTTTGCACGACGTATTGAAACAGTACGCTTGTTCCGCC  
MO00036-2 3121 CATTACAGCTGCGGCCGAAAGGGCGTTGGCAAATCATGTTTCTTTGCACGACGTATTGAAACAGTACGCTTGTTCCGCC  
MO00041-1 3121 CATTACAGCTGCGGCCGAAAGGGCGTTGGCAAATCATGTTTCTTTGCACGACGTATTGAAACAGTACGCTTGTTCCGCC  
MO00049-1 3121 TATTCAACGTGCGGCTGAACGGGCGTTGACAAATCATGTTTCTTTGCACGACGTATTGAAACAGTACGATTGTTCCGCC  
MO0009-1 1178 CATTACAGCTGCGGCCGAAAGGGCGTTGGCAAATCATGTTTCTTTGCACGACGTATTGAAACAGTACGTTGTTCCGCC  
MO00045-1 1178 TATTCAACGTGCGGCTGAAGGGCGTTGGCAAATCATGTTTCTTTGCGACGTATTGAAACAGTACGCTTGTTCCGCC  
2006-3950\_Strep -----

trpA

MO0003-2 3201 AAACCAATGATAAAACGCCGATTGTGTTAATGGGCTATTTGAACCCAGTACATAAAATGGGTTATAAAGCGTTTGACAA  
MO0027-1 3201 AAACCAATGATAAAACGCCGATTGTGTTAATGGGCTATTTGAACCCAGTACATAAAATGGGTTATAAAGCGTTTGACAA  
MO00027-2 3201 AAACCAATGATAAAACGCCGATTGTGTTAATGGGCTATTTGAACCCAGTACATAAAATGGGTTATAAAGCGTTTGACAA  
MO0009-2 3201 AAACCAATGATAAAACGCCGATTGTGTTAATGGGCTATTTGAACCCAGTACATAAAATGGGTTATAAAGCGTTTGACAA  
MO00029-1 3201 AAACCAATGATAAAACGCCGATTGTGTTAATGGGCTATTTGAACCCAGTACATAAAATGGGTTATAAAGCGTTTGACAA  
MO00036-1 3201 AAACCAATGATAAAACGCCGATTGTGTTAATGGGCTATTTGAACCCAGTACATAAAATGGGTTATAAAGCGTTTGACAA  
MO00036-2 3201 AAACCAATGATAAAACGCCGATTGTGTTAATGGGCTATTTGAACCCAGTACATAAAATGGGTTATAAAGCGTTTGACAA  
MO00041-1 3201 AAACCAATGATAAAACGCCGATTGTGTTAATGGGCTATTTGAACCCAGTACATAAAATGGGTTATAAAGCGTTTGACAA  
MO00049-1 3201 AAAC TAATGATAAAACGCCGTTGTGTTAATGGGCTATTTGAACCCATACATAAAATGGGCTATCAGGCGTTTGCGCAA  
MO0009-1 1258 AAACCAATGATAAAACGCCGATTGTGTTAATGGGCTATTTGAACCCAGTACATAAAATGGGTTATCAGGCGTTTGCGCAA  
MO00045-1 1258 AAACCAATGATAAAACGCCGTTGTGTTAATGGGCTATTTGAACCCGTGTACATAAAATGGGTTATCAGGCGTTTGCGCAA  
2006-3950\_Strep -----

trpA

MO0003-2 3281 GCGGCTGCCGACGCGGGCGTAGATGGCGTGTGACTGTGGATTCCCGGTAGAAACCATCACCCCGCTGCATGACTCTTT  
MO0027-1 3281 GCGGCTGCCGACGCGGGCGTAGATGGCGTGTGACTGTGGATTCCCGGTAGAAACCATCACCCCGCTGCATGACTCTTT  
MO00027-2 3281 GCGGCTGCCGACGCGGGCGTAGATGGCGTGTGACTGTGGATTCCCGGTAGAAACCATCACCCCGCTGCATGACTCTTT  
MO0009-2 3281 GCGGCTGCCGACGCGGGCGTAGATGGCGTGTGACTGTGGATTCCCGGTAGAAACCATCACCCCGCTGCATGACTCTTT  
MO00029-1 3281 GCGGCTGCCGACGCGGGCGTAGATGGCGTGTGACTGTGGATTCCCGGTAGAAACCATCACCCCGCTGCATGACTCTTT  
MO00036-1 3281 GCGGCTGCCGACGCGGGCGTAGATGGCGTGTGACTGTGGATTCCCGGTAGAAACCATCACCCCGCTGCATGACTCTTT  
MO00036-2 3281 GCGGCTGCCGACGCGGGCGTAGATGGCGTGTGACTGTGGATTCCCGGTAGAAACCATCACCCCGCTGCATGACTCTTT  
MO00041-1 3281 GCGGCTGCCGACGCGGGCGTAGATGGCGTGTGACTGTGGATTCCCGGTAGAAACCATCACCCCGCTGCATGACTCTTT  
MO00049-1 3281 GCGGCTGCCGAGGCGAGGCTAGATGGCGTGTGACCGTGGATTCTCCGGTAGAAACCATTCGCCCTTTGCATGAATCGTT  
MO0009-1 1338 GCGGCTGCCGACGCGGGCGTAGATGGCGTGTGACTGTGGATTCTCCGGTAGAAACCATTCGCCCTGCATGACTCGTT  
MO00045-1 1338 GCGGCTGCCGAGGCGAGGCTGTATGGCGTGTGACCGTAGATTCTCCGGTAGAAACCATTCGCCCTTTGCATGAGTCATT  
2006-3950\_Strep -----

trpA



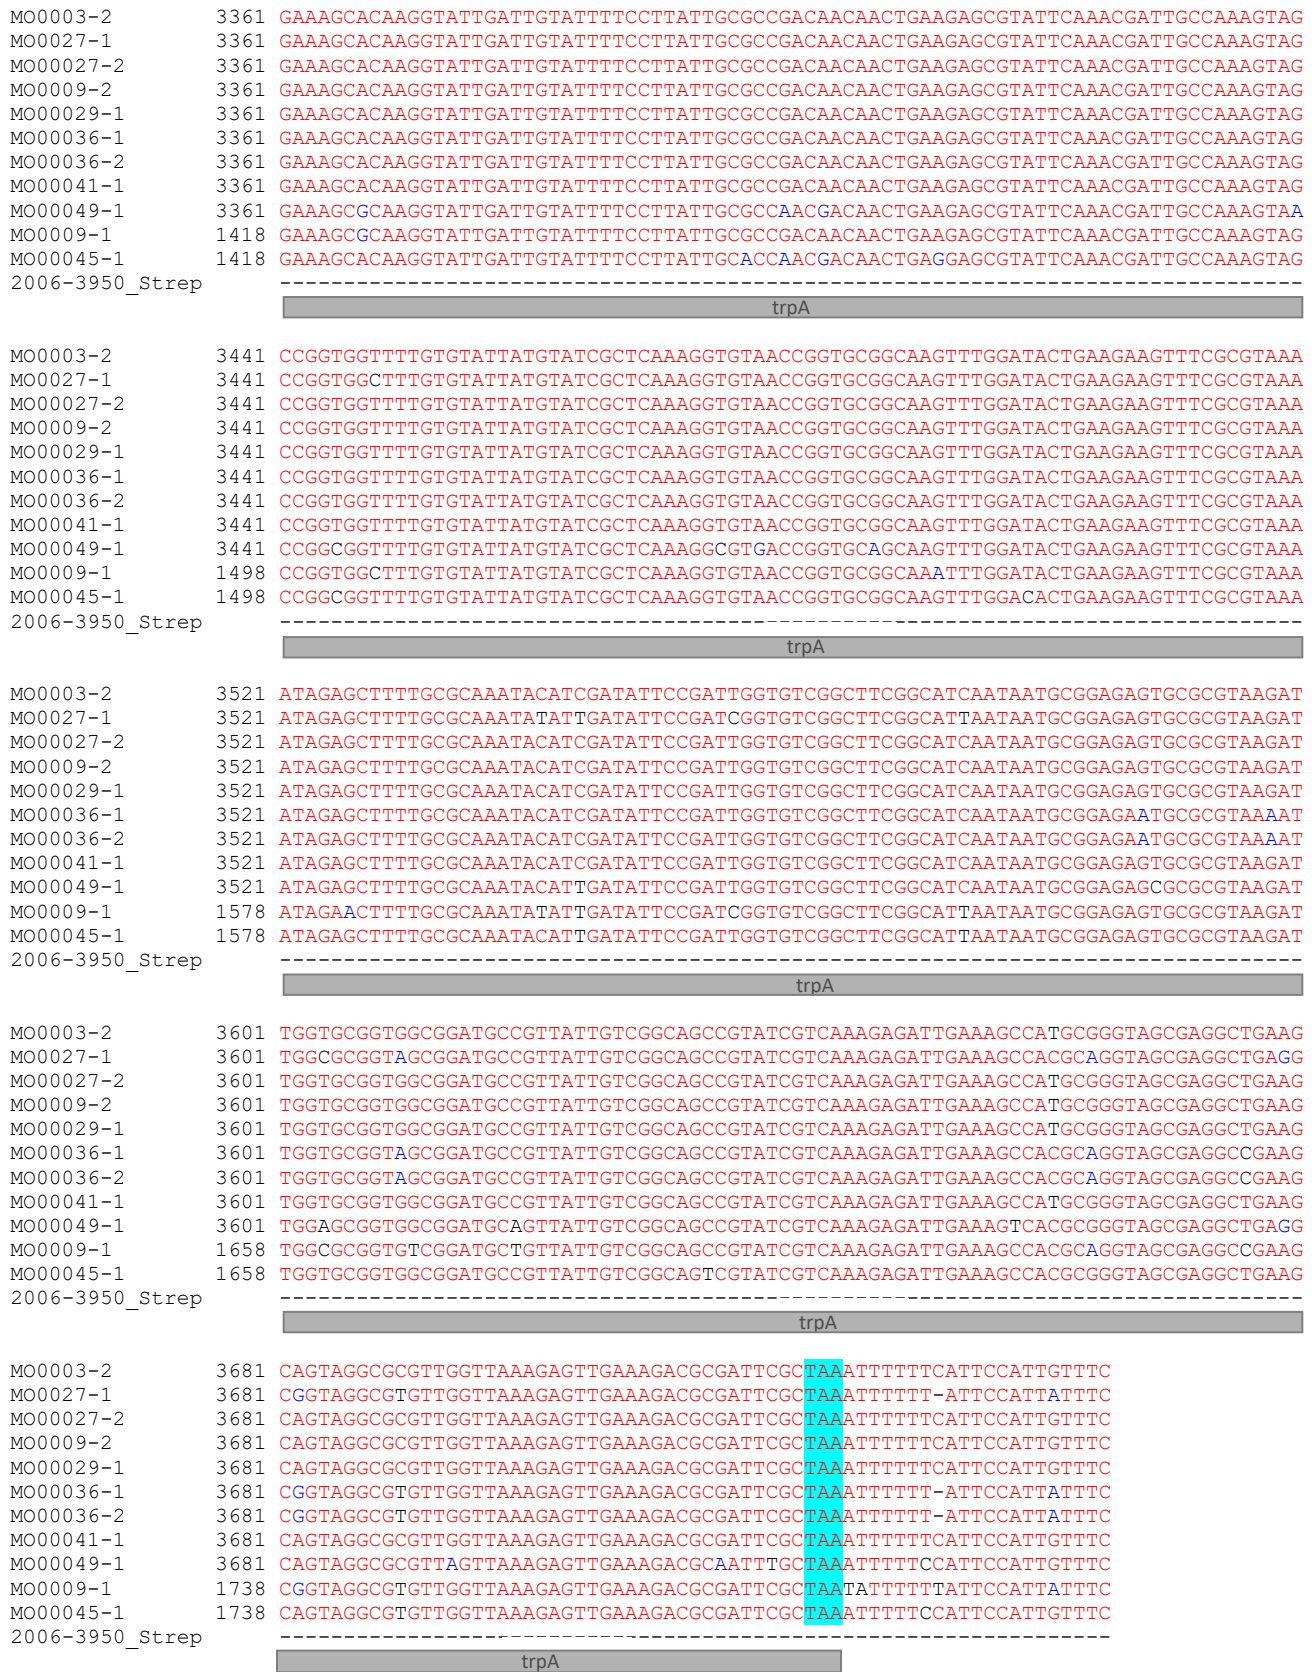

Supplemental figure 3. Alignment of all *N. subflava* at the integration site of *msr(D)* with up and downstream regions and integrated fragment of the MEGA element (region 2006-3950). Indicated are: *ihfA*, *msr(D)* and *trpA* in grey bar with start and top codon indicated in cyan background, *mefA* (fragment 880-1218) grey striped bar, regulatory sequence factor MYLIMF and DUS factor in yellow box, integration site with green horizontal line.
