# Supplementary material for: WGS of Commensal Neisseria Reveals Acquisition of a New Ribosomal Protection Protein (MsrD) as a Possible Explanation for High Level Azithromycin Resistance in Belgium
Source: MDPI journal article supplement (doi:10.3390/pathogens10030384), 2021-03-23

Supplemental figure 5. Acquisition of TetM (blue) in *N. gonorrhoeae* (MO0023/1) (A) and *N. subflava* (MO0009/1) (B). Genome assembly based on illumina only reads (A) and hybrid illumina – MinION reads (B). This clearly shows that *tetM* is plasmid-mediated in *N. gonorrhoeae*, but in *N. subflava* this gene is incorporated into the chromosome.

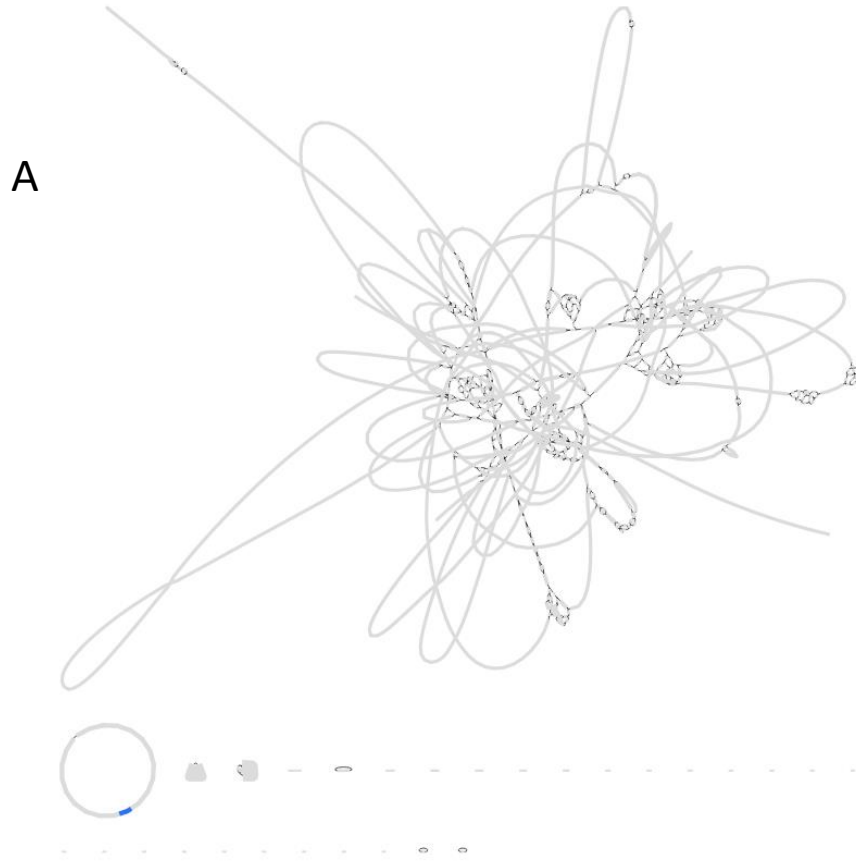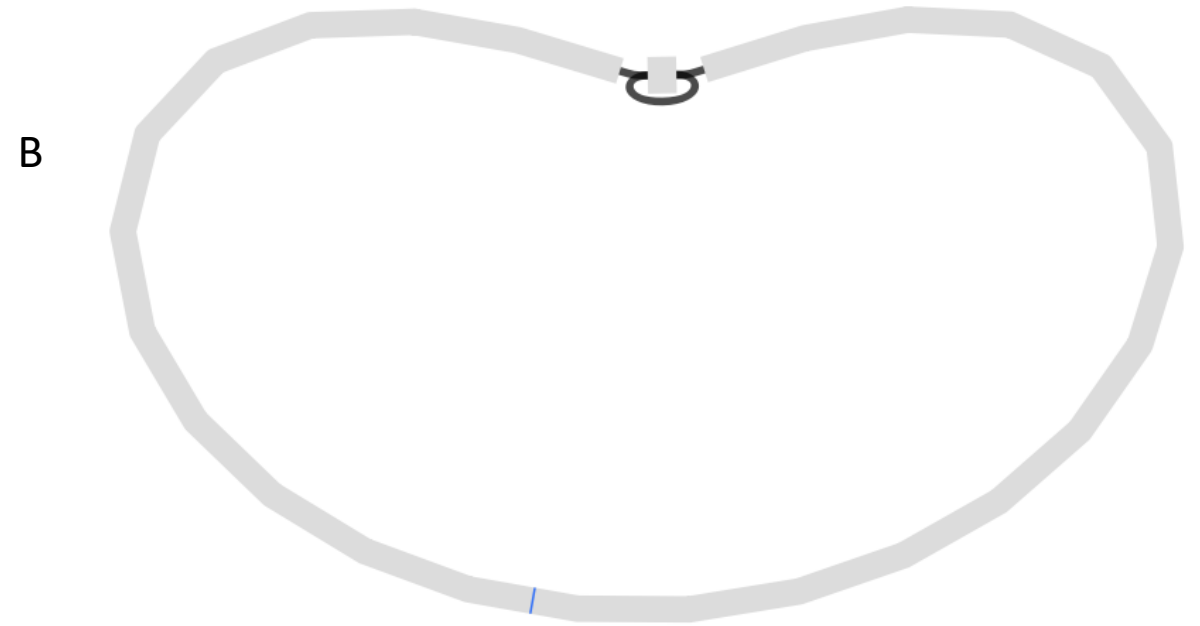

Supplement: s1 [file s1]
