# Supplementary material for: WGS of Commensal Neisseria Reveals Acquisition of a New Ribosomal Protection Protein (MsrD) as a Possible Explanation for High Level Azithromycin Resistance in Belgium
Source: Pathogens. 2021 Mar 23;10(3):384. doi: 10.3390/pathogens10030384 (PMC8005064; doi:10.3390/pathogens10030384)
Supplement: Supplementary file 1 [file pathogens-10-00384-s001.zip]

Archive with 7 entries (7 files):
- Supplemental figure 1b_II.pdf
- Supplemental_figure_1a_II.pdf
- Supplemental_Figure_2.pdf
- Supplemental_Figure_3.pdf
- Supplemental_Figure_4.pdf
- Supplemental_Figure_5_II.pdf
- Supplemental_Table_1.pdf
